# Supplementary material
Source: PubMed Central journal article supplement (PMC2222667)
Supplement: NIHMS37204-supplement-pdf.pdf [file NIHMS37204-supplement-pdf.pdf]

A. Letra<sup>1,2</sup>, R. Menezes<sup>1</sup>,  
J.M. Granjeiro<sup>3</sup>, and A.R. Vieira<sup>1\*</sup>

<sup>1</sup>Department of Oral Biology and Center for Craniofacial and Dental Genetics, School of Dental Medicine, 614 Salk Hall, University of Pittsburgh, 3501 Terrace Street, Pittsburgh, PA 15261, USA; <sup>2</sup>Department of Biological Sciences, School of Dentistry, University of São Paulo, Bauru, SP, and Bolsista CAPES/BEX, Brasília, Brazil; and <sup>3</sup>Department of Cellular and Molecular Biology, Biology Institute, Fluminense Federal University, Niterói, RJ, Brazil; \*corresponding author, arv11@dental.pitt.edu

# Defining Subphenotypes for Oral Clefts Based on Dental Development

*J Dent Res* 86(10):986-991, 2007

## APPENDIX

Differences in Observed Frequencies of Dental Anomalies between Individuals with Each Different Cleft Phenotype and Control Individuals. Significance Figures were Accounted for by the Bonferroni Correction (0.05/176 tests;  $\alpha = 0.0002$ ).

### 1. Complete Cleft Palate x Control

| Dental Anomaly | Complete Cleft Palate (n = 21) | Control (n = 500) | p Value |
|----------------|--------------------------------|-------------------|---------|
| Agenesis       | 4                              | 36                | 0.04    |
| Microdontia    | 0                              | 1                 | 0.8     |
| Supernumerary  | 0                              | 1                 | 0.8     |
| Malposition    | 0                              | 2                 | 0.7     |
| Impaction      | 2                              | 1                 | 0.00001 |
| Malformation   | 0                              | 0                 | —       |
| Transposition  | 0                              | 0                 | —       |
| Multiple       | 2                              | 1                 | 0.00001 |
| Total          | 8                              | 42                | 0.00001 |

### 2. Incomplete Cleft Palate x Control

| Dental Anomaly | Incomplete Cleft Palate (n = 45) | Control (n = 500) | p Value |
|----------------|----------------------------------|-------------------|---------|
| Agenesis       | 10                               | 36                | 0.0005  |
| Microdontia    | 0                                | 1                 | 0.7     |
| Supernumerary  | 1                                | 1                 | 0.03    |
| Malposition    | 4                                | 2                 | 0.00001 |
| Impaction      | 0                                | 1                 | 0.7     |
| Malformation   | 1                                | 0                 | 0.0008  |
| Transposition  | 0                                | 0                 | —       |
| Multiple       | 0                                | 1                 | 0.7     |
| Total          | 16                               | 42                | 0.00001 |

### 3. Total Cleft Palate x Control

| Dental Anomaly | Cleft Palate (n = 66) | Control (n = 500) | p Value |
|----------------|-----------------------|-------------------|---------|
| Agenesis       | 14                    | 36                | 0.0001  |
| Microdontia    | 0                     | 1                 | 0.7     |
| Supernumerary  | 1                     | 1                 | 0.09    |
| Malposition    | 4                     | 2                 | 0.00001 |
| Impaction      | 2                     | 1                 | 0.002   |
| Malformation   | 1                     | 0                 | 0.005   |
| Transposition  | 0                     | 0                 | —       |
| Multiple       | 2                     | 1                 | 0.002   |
| Total          | 24                    | 42                | 0.00001 |

## 4. Complete Cleft Lip and Palate (unilateral + bilateral) x Control

| Dental Anomaly | Complete Cleft Lip and Palate (n = 300) | Control (n = 500) | p Value |
|----------------|-----------------------------------------|-------------------|---------|
| Agenesis       | 90                                      | 36                | 0.00001 |
| Microdontia    | 7                                       | 1                 | 0.003   |
| Supernumerary  | 16                                      | 1                 | 0.00001 |
| Malposition    | 30                                      | 2                 | 0.00001 |
| Impaction      | 3                                       | 1                 | 0.1     |
| Malformation   | 0                                       | 0                 | —       |
| Transposition  | 5                                       | 0                 | 0.003   |
| Multiple       | 17                                      | 1                 | 0.00001 |
| Total          | 168                                     | 42                | 0.00001 |

## 5. Incomplete Cleft Lip and Palate (unilateral + bilateral) x Control

| Dental Anomaly | Incomplete Cleft Lip and Palate (n = 104) | Control (n = 500) | p Value   |
|----------------|-------------------------------------------|-------------------|-----------|
| Agenesis       | 23                                        | 36                | 0.00001   |
| Microdontia    | 1                                         | 1                 | 0.2       |
| Supernumerary  | 4                                         | 1                 | 0.0001    |
| Malposition    | 12                                        | 2                 | 0.00001   |
| Impaction      | 1                                         | 1                 | 0.2       |
| Malformation   | 0                                         | 0                 | —         |
| Transposition  | 2                                         | 0                 | 0.001     |
| Multiple       | 3                                         | 1                 | 0.002     |
| Total          | 44                                        | 42                | 0.0000001 |

## 6. Unilateral Cleft Lip and Palate x Control

| Dental Anomaly | Unilateral Cleft Lip and Palate (n = 250) | Control (n = 500) | p Value |
|----------------|-------------------------------------------|-------------------|---------|
| Agenesis       | 71                                        | 36                | 0.00001 |
| Microdontia    | 6                                         | 1                 | 0.003   |
| Supernumerary  | 16                                        | 1                 | 0.00001 |
| Malposition    | 27                                        | 2                 | 0.00001 |
| Impaction      | 3                                         | 1                 | 0.07    |
| Malformation   | 0                                         | 0                 | —       |
| Transposition  | 3                                         | 0                 | 0.01    |
| Multiple       | 16                                        | 1                 | 0.00001 |
| Total          | 139                                       | 42                | 0.00001 |

## 7. Complete Unilateral Cleft Lip and Palate x Control

| Dental Anomaly | Complete Unilateral Cleft Lip and Palate (n = 175) | Control (n = 500) | p Value |
|----------------|----------------------------------------------------|-------------------|---------|
| Agenesis       | 57                                                 | 36                | 0.00001 |
| Microdontia    | 5                                                  | 1                 | 0.001   |
| Supernumerary  | 14                                                 | 1                 | 0.00001 |
| Malposition    | 19                                                 | 2                 | 0.00001 |
| Impaction      | 2                                                  | 1                 | 0.1     |
| Malformation   | 0                                                  | 0                 | —       |
| Transposition  | 1                                                  | 0                 | 0.09    |
| Multiple       | 13                                                 | 1                 | 0.00001 |
| Total          | 111                                                | 42                | 0.00001 |

## 8. Incomplete Unilateral Cleft Lip and Palate x Control

| Dental Anomaly | Incomplete Unilateral Cleft Lip and Palate (n = 75) | Control (n = 500) | p Value |
|----------------|-----------------------------------------------------|-------------------|---------|
| Agenesis       | 14                                                  | 36                | 0.001   |
| Microdontia    | 1                                                   | 1                 | 0.1     |
| Supernumerary  | 2                                                   | 1                 | 0.006   |
| Malposition    | 8                                                   | 2                 | 0.00001 |
| Impaction      | 1                                                   | 1                 | 0.1     |
| Malformation   | 0                                                   | 0                 | —       |
| Transposition  | 2                                                   | 0                 | 0.0003  |
| Multiple       | 3                                                   | 1                 | 0.0002  |
| Total          | 31                                                  | 42                | 0.00001 |

## 9. Unilateral Right Cleft Lip and Palate x Control

| Dental Anomaly | Total Right Cleft Lip and Palate (n = 78) | Control (n = 500) | p Value |
|----------------|-------------------------------------------|-------------------|---------|
| Agenesis       | 28                                        | 36                | 0.00001 |
| Microdontia    | 2                                         | 1                 | 0.006   |
| Supernumerary  | 3                                         | 1                 | 0.0003  |
| Malposition    | 9                                         | 2                 | 0.00001 |
| Impaction      | 1                                         | 1                 | 0.1     |
| Malformation   | 0                                         | 0                 | —       |
| Transposition  | 0                                         | 0                 | —       |
| Multiple       | 2                                         | 1                 | 0.006   |
| Total          | 45                                        | 42                | 0.00001 |

## 10. Complete Unilateral Right Cleft Lip and Palate x Control

| Dental Anomaly | Complete Unilateral Right Cleft Lip and Palate (n = 54) | Control (n = 500) | p Value |
|----------------|---------------------------------------------------------|-------------------|---------|
| Agenesis       | 23                                                      | 36                | 0.00001 |
| Microdontia    | 2                                                       | 1                 | 0.0008  |
| Supernumerary  | 3                                                       | 1                 | 0.00001 |
| Malposition    | 6                                                       | 2                 | 0.00001 |
| Impaction      | 0                                                       | 1                 | 0.7     |
| Malformation   | 0                                                       | 0                 | —       |
| Transposition  | 0                                                       | 0                 | —       |
| Multiple       | 2                                                       | 1                 | 0.0008  |
| Total          | 36                                                      | 42                | 0.00001 |

## 11. Incomplete Unilateral Right Cleft Lip and Palate x Control

| Dental Anomaly | Incomplete Unilateral Right Cleft Lip and Palate (n = 16) | Control (n = 500) | p Value |
|----------------|-----------------------------------------------------------|-------------------|---------|
| Agenesis       | 3                                                         | 36                | 0.08    |
| Microdontia    | 0                                                         | 1                 | 0.8     |
| Supernumerary  | 0                                                         | 1                 | 0.8     |
| Malposition    | 3                                                         | 2                 | 0.00001 |
| Impaction      | 0                                                         | 1                 | 0.8     |
| Malformation   | 0                                                         | 0                 | —       |
| Transposition  | 0                                                         | 0                 | —       |
| Multiple       | 0                                                         | 1                 | 0.8     |
| Total          | 6                                                         | 42                | 0.00001 |

## 12. Incomplete Unilateral Right Cleft Lip and Palate + Cleft Palate x Control

| Dental Anomaly | Incomplete Unilateral Right Cleft Lip and Palate + Cleft Palate (n = 8) | Control (n = 500) | p Value |
|----------------|-------------------------------------------------------------------------|-------------------|---------|
| Agenesis       | 2                                                                       | 36                | 0.05    |
| Microdontia    | 0                                                                       | 1                 | 0.9     |
| Supernumerary  | 0                                                                       | 1                 | 0.9     |
| Malposition    | 0                                                                       | 2                 | 0.8     |
| Impaction      | 1                                                                       | 1                 | 0.8     |
| Malformation   | 0                                                                       | 0                 | —       |
| Transposition  | 0                                                                       | 0                 | —       |
| Multiple       | 0                                                                       | 1                 | 0.9     |
| Total          | 3                                                                       | 42                | 0.004   |

## 13. Unilateral Left Cleft Lip and Palate x Control

| Dental Anomaly | Unilateral Left Cleft Lip and Palate (n = 172) | Control (n = 500) | p Value |
|----------------|------------------------------------------------|-------------------|---------|
| Agenesis       | 43                                             | 36                | 0.00001 |
| Microdontia    | 4                                              | 1                 | 0.005   |
| Supernumerary  | 13                                             | 1                 | 0.00001 |
| Malposition    | 18                                             | 2                 | 0.00001 |
| Impaction      | 2                                              | 1                 | 0.1     |
| Malformation   | 0                                              | 0                 | —       |
| Transposition  | 3                                              | 0                 | 0.003   |
| Multiple       | 14                                             | 1                 | 0.00001 |
| Total          | 97                                             | 42                | 0.00001 |

## 14. Complete Unilateral Left Cleft Lip and Palate x Control

| Dental Anomaly | Complete Unilateral Left Cleft Lip and Palate (n = 121) | Control (n = 500) | p Value |
|----------------|---------------------------------------------------------|-------------------|---------|
| Agenesis       | 34                                                      | 36                | 0.00001 |
| Microdontia    | 3                                                       | 1                 | 0.005   |
| Supernumerary  | 11                                                      | 1                 | 0.00001 |
| Malposition    | 13                                                      | 2                 | 0.00001 |
| Impaction      | 2                                                       | 1                 | 0.03    |
| Malformation   | 0                                                       | 0                 | —       |
| Transposition  | 1                                                       | 0                 | 0.04    |
| Multiple       | 11                                                      | 1                 | 0.00001 |
| Total          | 75                                                      | 42                | 0.00001 |

## 15. Incomplete Unilateral Left Cleft Lip and Palate x Control

| Dental Anomaly | Incomplete Unilateral Left Cleft Lip and Palate (n = 46) | Control (n = 500) | p Value |
|----------------|----------------------------------------------------------|-------------------|---------|
| Agenesis       | 9                                                        | 36                | 0.003   |
| Microdontia    | 1                                                        | 1                 | 0.03    |
| Supernumerary  | 2                                                        | 1                 | 0.0002  |
| Malposition    | 5                                                        | 2                 | 0.00001 |
| Impaction      | 0                                                        | 1                 | 0.7     |
| Malformation   | 0                                                        | 0                 | —       |
| Transposition  | 2                                                        | 0                 | 0.00001 |
| Multiple       | 3                                                        | 1                 | 0.00001 |
| Total          | 22                                                       | 42                | 0.00001 |

## 16. Incomplete Unilateral Left Cleft Lip and Palate + Cleft Palate x Control

| Dental Anomaly | Incomplete Unilateral Left Cleft Lip and Palate + Cleft Palate (n = 5) | Control (n = 500) | p Value |
|----------------|------------------------------------------------------------------------|-------------------|---------|
| Agenesis       | 0                                                                      | 36                | 0.5     |
| Microdontia    | 0                                                                      | 1                 | 0.9     |
| Supernumerary  | 0                                                                      | 1                 | 0.9     |
| Malposition    | 0                                                                      | 2                 | 0.9     |
| Impaction      | 0                                                                      | 1                 | 0.9     |
| Malformation   | 0                                                                      | 0                 | —       |
| Transposition  | 0                                                                      | 0                 | —       |
| Multiple       | 0                                                                      | 1                 | 0.9     |
| Total          | 0                                                                      | 42                | 0.5     |

## 17. Bilateral Cleft Lip and Palate x Control

| Dental Anomaly | Bilateral Cleft Lip and Palate (n = 154) | Control (n = 500) | p Value |
|----------------|------------------------------------------|-------------------|---------|
| Agenesis       | 42                                       | 36                | 0.00001 |
| Microdontia    | 2                                        | 1                 | 0.07    |
| Supernumerary  | 4                                        | 1                 | 0.002   |
| Malposition    | 15                                       | 2                 | 0.00001 |
| Impaction      | 1                                        | 1                 | 0.3     |
| Malformation   | 0                                        | 0                 | —       |
| Transposition  | 4                                        | 0                 | 0.0003  |
| Multiple       | 4                                        | 1                 | 0.002   |
| Total          | 72                                       | 42                | 0.00001 |

## 18. Complete Bilateral Cleft Lip and Palate x Control

| Dental Anomaly | Complete Bilateral Cleft Lip and Palate (n = 125) | Control (n = 500) | p Value   |
|----------------|---------------------------------------------------|-------------------|-----------|
| Agenesis       | 33                                                | 36                | 0.00001   |
| Microdontia    | 2                                                 | 1                 | 0.04      |
| Supernumerary  | 2                                                 | 1                 | 0.04      |
| Malposition    | 11                                                | 2                 | 0.00001   |
| Impaction      | 1                                                 | 1                 | 0.3       |
| Malformation   | 0                                                 | 0                 | —         |
| Transposition  | 4                                                 | 0                 | 0.00001   |
| Multiple       | 4                                                 | 1                 | 0.0008    |
| Total          | 57                                                | 42                | 0.0000001 |

## 19. Incomplete Bilateral Cleft Lip and Palate x Control

| Dental Anomaly | Incomplete Bilateral Cleft Lip (n = 8) | Control (n = 500) | p Value |
|----------------|----------------------------------------|-------------------|---------|
| Agenesis       | 1                                      | 36                | 0.5     |
| Microdontia    | 0                                      | 1                 | 0.9     |
| Supernumerary  | 1                                      | 1                 | 0.00001 |
| Malposition    | 1                                      | 2                 | 0.00001 |
| Impaction      | 0                                      | 1                 | 0.9     |
| Malformation   | 0                                      | 0                 | —       |
| Transposition  | 0                                      | 0                 | —       |
| Multiple       | 0                                      | 1                 | 0.9     |
| Total          | 3                                      | 42                | 0.004   |

## 20. Incomplete Bilateral Cleft Lip and Palate + Cleft Palate x Control

| Dental Anomaly | Incomplete Bilateral Cleft Lip and Palate + Cleft Palate (n = 17) | Control (n = 500) | p Value |
|----------------|-------------------------------------------------------------------|-------------------|---------|
| Agenesis       | 7                                                                 | 36                | 0.00001 |
| Microdontia    | 0                                                                 | 1                 | 0.8     |
| Supernumerary  | 1                                                                 | 1                 | 0.0002  |
| Malposition    | 3                                                                 | 2                 | 0.00001 |
| Impaction      | 0                                                                 | 1                 | 0.8     |
| Malformation   | 0                                                                 | 0                 | —       |
| Transposition  | 0                                                                 | 0                 | —       |
| Multiple       | 0                                                                 | 1                 | 0.8     |
| Total          | 11                                                                | 42                | 0.00001 |

## 21. Incomplete Mixed Bilateral Cleft Lip and Palate x Control

| Dental Anomaly | Incomplete Mixed Bilateral Cleft Lip and Palate (n = 4) | Control (n = 500) | p Value |
|----------------|---------------------------------------------------------|-------------------|---------|
| Agenesis       | 1                                                       | 36                | 0.1     |
| Microdontia    | 0                                                       | 1                 | 0.9     |
| Supernumerary  | 0                                                       | 1                 | 0.9     |
| Malposition    | 0                                                       | 2                 | 0.9     |
| Impaction      | 0                                                       | 1                 | 0.9     |
| Malformation   | 0                                                       | 0                 | —       |
| Transposition  | 0                                                       | 0                 | —       |
| Multiple       | 0                                                       | 1                 | 0.9     |
| Total          | 1                                                       | 42                | 0.2     |

## 22. Total Cleft Lip and Palate x Control

| Dental Anomaly | Total Cleft Lip and Palate (n = 406) | Control (n = 500) | p Value |
|----------------|--------------------------------------|-------------------|---------|
| Agenesis       | 113                                  | 36                | 0.00001 |
| Microdontia    | 8                                    | 1                 | 0.007   |
| Supernumerary  | 20                                   | 1                 | 0.00001 |
| Malposition    | 42                                   | 2                 | 0.00001 |
| Impaction      | 4                                    | 1                 | 0.1     |
| Malformation   | 0                                    | 0                 | —       |
| Transposition  | 7                                    | 0                 | 0.003   |
| Multiple       | 20                                   | 1                 | 0.00001 |
| Total          | 217                                  | 42                | 0.00001 |
